# Supplementary material for: Bio-syncretic tweezers actuated by microorganisms: modeling and analysis
Source: Royal Society of Chemistry journal article supplement (doi:10.1039/c6sm01055e), 2016-01-01
Supplement: c6sm01055e1.pdf [file c6sm01055e1.pdf]

**The caption of Movie. S1:**

Movie. S1. Movement of micro particle actuated by a bio-syncretic tweezer with *Pandorina morum* cells in light-spot induced mode.

**The caption of Movie. S2:**

Movie. S2. Movement of micro half-cylinder actuated by a bio-syncretic tweezer with *Chlamydomonas reinhardtii* cells in geometric shape-induced mode.

**The caption of Movie. S3:**

Movie. S3. Movement of micro half-cylinder actuated by a bio-syncretic tweezer with *Pandorina morum* cells in geometric shape-induced mode.

**The caption of Movie. S4:**

Movie. S4. Rotation of micro gear with wide teeth actuated by a bio-syncretic tweezer with *Pandorina morum* cells in geometric shape-induced mode.

**The caption of Movie. S5:**

Movie. S5. Rotation of micro gear with narrow teeth actuated by a bio-syncretic tweezer with *Pandorina morum* cells in geometric shape-induced mode.
